# Supplementary material for: Sequencing of the black rockfish chromosomal genome provides insight into sperm storage in the female ovary
Source: PubMed Central journal article supplement — DNA Res. 2019 Nov 23;26(6):453–64. doi: 10.1093/dnares/dsz023 (PMC6993816; doi:10.1093/dnares/dsz023), 2019-11-23
Supplement: dsz023_supplementary_data.pdf [file dsz023_supplementary_data.pdf]

Supplementary Fig S1

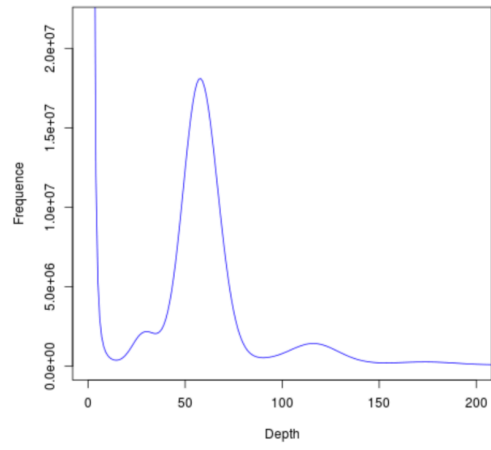

Fig. S1. 17-mer survey for genome size estimation

Supplementary table S1 Genome assembly comparison of *Sebastes schlegelii* with other public teleost genomes.

| Species                      | Name                            | Contig<br>N50(Kb) | Scaffold<br>N50(Mb) | Genome<br>size(Mb) |
|------------------------------|---------------------------------|-------------------|---------------------|--------------------|
| Chinese clearhead<br>icefish | <i>Protosalanx hyalocranius</i> | 17.2              | 1.163               | 536                |
| channel catfish              | <i>Ictalurus punctatus</i>      | 48.5              | 7.2                 | 845.4              |
| ocean sunfish                | <i>Mola mola</i>                | 20                | 9                   | 642                |
| seahorse                     | <i>Hippocampus erectus</i>      | 14.57             | 1.97                | 458                |
| Monopterus albus             | <i>Monopterus albus</i>         | 22.2              | 2.1                 | 689.5              |
| yellow catfish               | <i>Pelteobagrus fulvidraco</i>  | 1100              | 25.8                | 732.8              |
| Siamese fighting fish        | <i>Betta splendens</i>          | 19.01             | 0.949               | 465.24             |
| spotted sea bass             | <i>Lateolabrax maculatus</i>    | 31                | 1.04                | 620                |
| Japanese flounder            | <i>Paralichthys olivaceus</i>   | 30.5              | 3.9                 | 546                |
| Stickleback                  | <i>Gasterosteus aculeatus</i>   | 83.2              | 10.8                | 463                |
| Asian seabass                | <i>Lates calcarifer</i>         | 1060              | 25.8                | 700                |
| Fugu                         | <i>Takifugu rubripes</i>        | 52.5              | 0.9                 | 332.5              |
| Green spotted puffer         | <i>Tetraodon nigroviridis</i>   | 16                | 0.98                | 342                |
| Platyfish                    | <i>Xiphophorus maculatus</i>    | 22                | 1.1                 | 669                |
| Zebrafish                    | <i>Danio rerio</i>              | 25                | 1.5                 | 1412               |
| Atlantic Cod                 | <i>Gadus morhua</i>             | 2.8               | 0.68                | 753                |
| Nile tilapia                 | <i>Oreochromis niloticus</i>    | 3300              | 38.839              | -                  |
| Medaka                       | <i>Oryzias latipes</i>          | 3516              | 32.853              | -                  |
| <b>black rockfish</b>        | <i>Sebastes schlegelii</i>      | 2960              | 35.63               | 848.31             |

Supplementary table S2 General statistics of predicted protein-coding genes of *S. schlegelii*.

|         | Gene Set    | Number  | Mean transcript length (bp) | Mean CDS length(bp) | Mean exons per gene | Mean exon length (bp) | Mean intron length (bp) |
|---------|-------------|---------|-----------------------------|---------------------|---------------------|-----------------------|-------------------------|
| De novo | Augustus    | 33,088  | 10,539.75                   | 1,261.75            | 7.16                | 176.25                | 1,506.47                |
|         | GlimmerH    | 88,475  | 8,460.80                    | 626.82              | 4.22                | 148.53                | 2,432.82                |
| Homolog | MM          |         |                             |                     |                     |                       |                         |
|         | SNAP        | 53,379  | 17,025.75                   | 965.18              | 6.64                | 145.37                | 2,847.81                |
|         | Geneid      | 30,008  | 17,396.42                   | 1,270.06            | 8.21                | 154.64                | 2,235.67                |
|         | Cse         | 25,368  | 11,492.08                   | 1,475.24            | 7.89                | 187.08                | 1,454.74                |
|         | Dre         | 24,236  | 10,802.68                   | 1,418.97            | 7.52                | 188.79                | 1,440.07                |
|         | Hco         | 24,910  | 11,149.68                   | 1,483.02            | 7.80                | 190.19                | 1,422.11                |
|         | Mal         | 24,538  | 12,009.32                   | 1,511.54            | 8.31                | 181.88                | 1,435.92                |
|         | Ola         | 28,713  | 8,431.19                    | 1,195.74            | 6.39                | 187.07                | 1,341.93                |
|         | Omy         | 27,655  | 9,484.41                    | 1,270.32            | 6.62                | 191.83                | 1,461.06                |
|         | Oni         | 27,688  | 10,007.18                   | 1,334.92            | 7.26                | 183.88                | 1,385.40                |
|         | Pol         | 26,310  | 10,912.77                   | 1,428.24            | 7.79                | 183.41                | 1,397.42                |
|         | Tru         | 24,076  | 10,651.52                   | 1,373.31            | 7.60                | 180.66                | 1405.44                 |
|         | Xma         | 27,932  | 9,358.03                    | 1,314.11            | 7.03                | 187.01                | 1,334.63                |
| RNAseq  | PASA        | 111,844 | 11,440.67                   | 1,180.06            | 7.21                | 163.72                | 1,652.83                |
|         | Clufflinks  | 73,010  | 21,892.11                   | 3,749.42            | 9.81                | 382.34                | 2,060.12                |
|         | EVM         | 33,429  | 11,983.27                   | 1,276.30            | 7.46                | 171.16                | 1,658.27                |
|         | Pasa-update | 33,014  | 12,416.65                   | 1,301.86            | 7.55                | 172.45                | 1,697.16                |
|         | Final set   | 26,979  | 14,159.49                   | 1,452.03            | 8.63                | 168.32                | 1,666.16                |

Supplementary table S3 Comparison of gene structure of the *S. schlegelii* with other closely related teleost fish species.

| Species    | Number | Mean transcript length (bp) | Mean CDS length (bp) | Mean exons per gene | Mean exon length (bp) | Mean intron length (bp) |
|------------|--------|-----------------------------|----------------------|---------------------|-----------------------|-------------------------|
| Cse        | 21,384 | 11,361.13                   | 1,788.94             | 10.57               | 169.31                | 1,000.66                |
| Dre        | 32,717 | 26,276.99                   | 1,703.07             | 9.45                | 180.30                | 2,909.61                |
| Hco        | 21,175 | 12,202.42                   | 1,760.28             | 10.48               | 167.96                | 1,101.43                |
| Mal        | 21,343 | 15,854.92                   | 1,777.40             | 10.60               | 167.67                | 1,466.34                |
| Ola        | 19,699 | 12,145.38                   | 1,515.82             | 10.25               | 147.83                | 1,148.65                |
| Omy        | 42,767 | 19,611.54                   | 1,578.13             | 8.77                | 179.84                | 2,319.42                |
| Oni        | 21,437 | 14,892.56                   | 1,714.22             | 10.90               | 157.24                | 1,330.90                |
| Pol        | 23,113 | 12,205.37                   | 1,656.58             | 9.79                | 169.25                | 1,200.40                |
| <b>SSc</b> | 26,979 | 14,159.49                   | 1,452.03             | 8.63                | 168.32                | 1,666.16                |
| Tru        | 18,523 | 7,489.66                    | 1,693.53             | 11.10               | 152.59                | 573.97                  |
| Xma        | 20,379 | 13,751.46                   | 1,643.24             | 10.69               | 153.77                | 1,250.07                |
